# Supplementary material for: SRSF3 Expression Serves as a Potential Biomarker for Prognostic and Immune Response in Pan-Cancer
Source: Front Oncol. 2022 Apr 14;12:808530. doi: 10.3389/fonc.2022.808530 (PMC9047863; doi:10.3389/fonc.2022.808530)
Supplement: Supplementary file 4 [file Table_1.xlsx]

## Sheet: Supplementary Table 1
Table S1. The clinicopathological parameters of patients enrolled in this study
ID	Cancer type	Age	Gender	Stage	Lymphatic metastasis	Distant metastasis	Differentiate degree
1	CHOL	74	F	II	No	No	II
2	CHOL	79	M	I	No	No	III
3	CHOL	61	M	III	No	No	II
4	COAD	73	M	III	No	No	II
5	COAD	67	M	III	No	No	II
6	COAD	56	F	I	No	No	III
7	ESCA	54	M	IIIC	Yes	No	II
8	ESCA	62	M	II	No	No	II
9	ESCA	62	M	II	No	No	II
10	GBM	80	M	IV	No	No	III
11	GBM	50	M	II	No	No	II
12	GBM	55	M	III	No	No	III
13	HNSC	45	F	I	No	No	III
14	HNSC	59	F	II	No	No	II
15	HNSC	50	F	II	No	No	III
16	LIHC	77	F	III	No	No	II
17	LIHC	69	F	I	No	No	III
18	LIHC	67	F	III	No	Yes	II
19	LUAD	70	M	II	No	No	II
20	LUAD	68	M	II	No	No	II
21	LUAD	60	M	III	No	No	I
22	LUSC	67	M	II	No	No	II
23	LUSC	57	M	IV	Yes	Yes	I-II
24	LUSC	54	F	II	No	No	II
25	STAD	63	M	II	No	No	III
26	STAD	50	F	III	Yes	No	I
27	STAD	77	M	II	No	No	II
28	KICH	61	M	II	No	No	II
29	KICH	42	M	I	No	No	III
30	KICH	64	F	II	No	No	II
31	KIRP	60	M	III	No	No	II
32	KIRP	60	M	III	No	Yes	II
33	KIRP	63	M	I	No	No	III
34	THCA	56	F	I	No	No	II
35	THCA	63	M	II	No	No	II
36	THCA	50	F	II	No	No	III
